# Supplementary material
Source: PubMed Central journal article supplement (PMC122723)

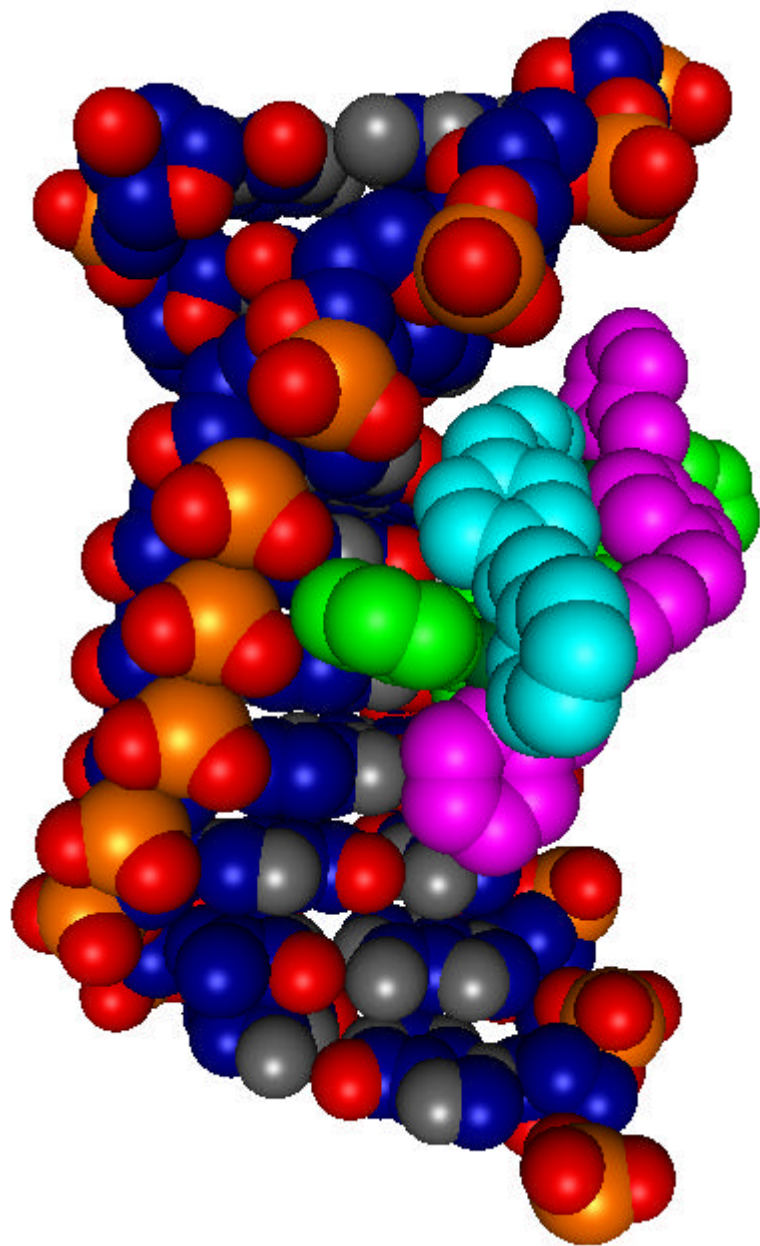

Supplement: pnas_99_8_5069__3.pdf [file pnas_99_8_5069__3.pdf]

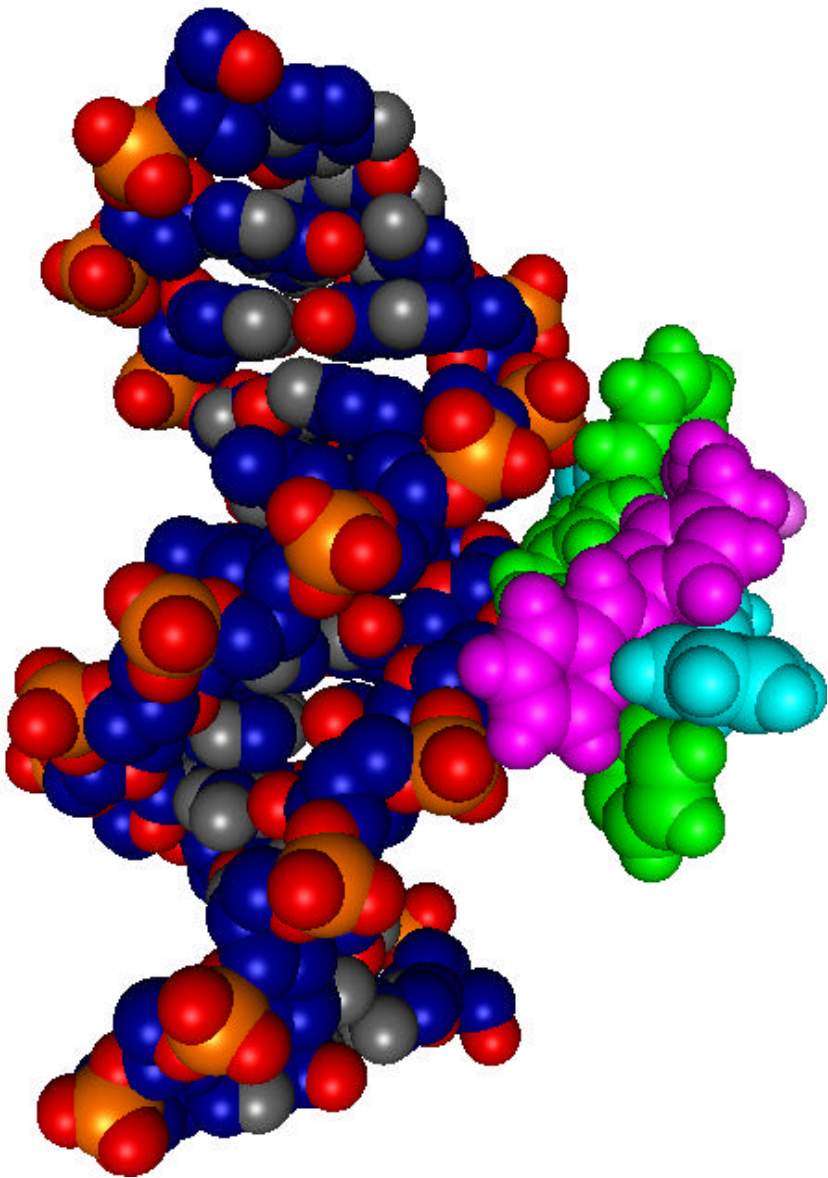

Supplement: pnas_99_8_5069__5.pdf [file pnas_99_8_5069__5.pdf]
